# Supplementary material for: Analysis of crystal assembly in banded spherulites of phthalic acid upon solvent evaporation
Source: Royal Society of Chemistry journal article supplement (doi:10.1039/c5ce02043c), 2016-01-01

# Analysis of Crystal Assembly in Banded Spherulites of Phthalic Acid upon Solvent Evaporation

*Eamor M. Woo, Graecia Lugito, and Cheng-En Yang*

Department of Chemical Engineering, National Cheng Kung University

No. 1, University Road, Tainan, 701-01, Taiwan

Original submission:

**CrysEngComm RSC**

\*Corresponding author: [emwoo@mail.ncku.edu.tw](mailto:emwoo@mail.ncku.edu.tw),

Fax: +886 6 234-4496, Phone: +886 6 275-7575 Ext. 62670

**Table S-1.** Properties of Solvents [chemical formulas and boiling points].

| Solvent                                                                                   | $T_{\text{boiling}}$ |
|-------------------------------------------------------------------------------------------|----------------------|
| Ethanol/water (20/80)                                                                     | 83.27 °C<br>94.69 °C |
| Ethanol 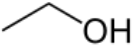 | 78.37 °C             |
| Water    | 100 °C               |
| THF      | 66 °C                |
| DMF      | 152 °C               |

**Figure S-1.** POM graphs of isophthalic acid dissolved in THF crystallized at different evaporation temperatures: (a) RT (b) 80°C (c) 110°C [scale bars = 20  $\mu\text{m}$ ].

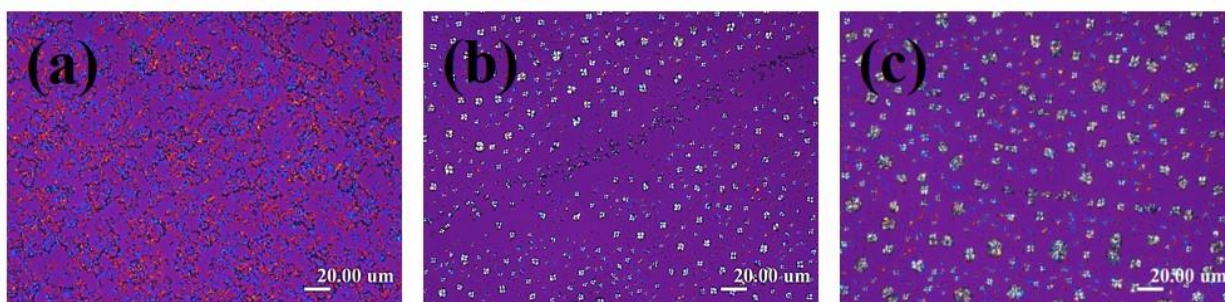

**Figure S-2.** POM graphs of isophthalic acid dissolved in DMF crystallized at different evaporation temperatures: (a) 80 (b) 110°C [scale bars = 20  $\mu\text{m}$ ].

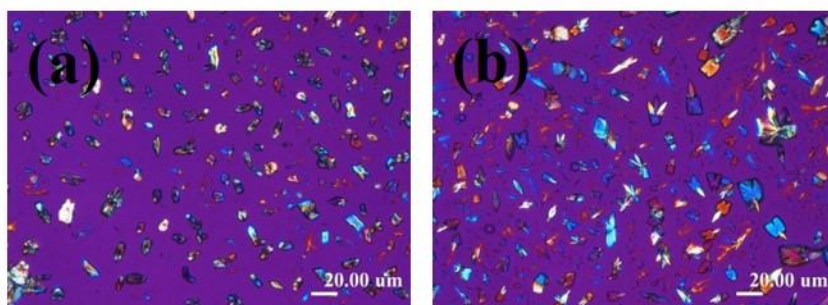

**Figure S-3.** POM graphs of terephthalic acid (TPA) dissolved in DMF crystallized at different evaporation temperatures: (a) 130 (b) 150°C (c) 170°C [scale bars = 20  $\mu\text{m}$ ].

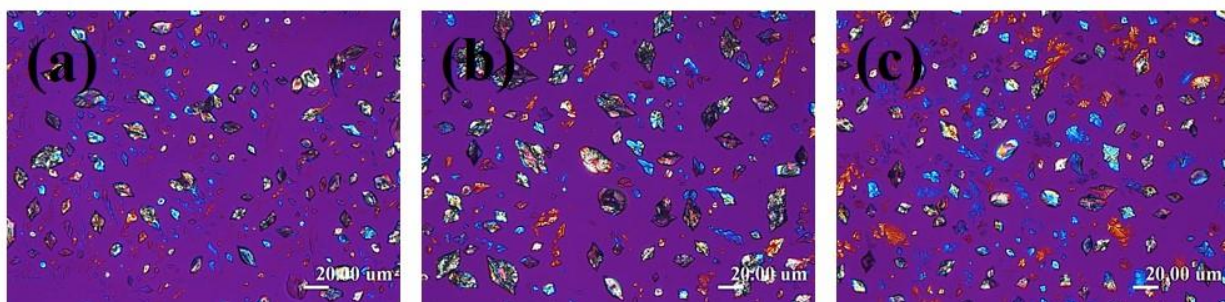

**Figure S-4.** POM graphs of benzoic acid dissolved in (20% ethanol-80% water) solution crystallized at different evaporation temperatures: (a) 60 (b) 70°C (c) 80°C [scale bars = 50  $\mu\text{m}$ ].

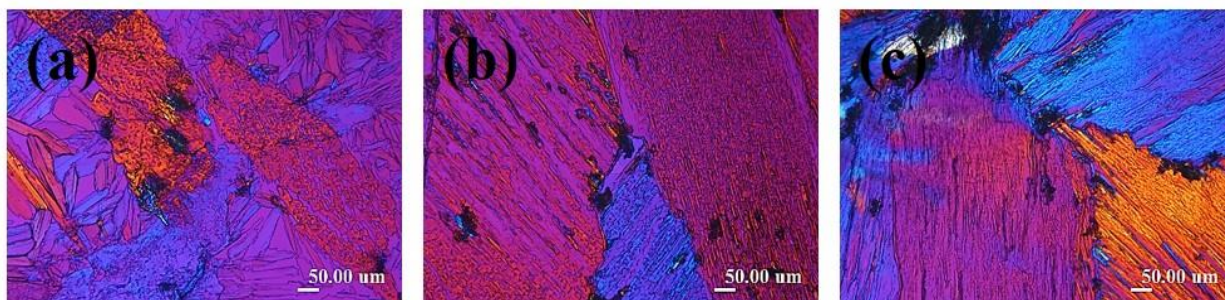

**Figure S-5.** POM graphs of benzoic acid dissolved in ethanol crystallized at different evaporation temperatures: (a) 50 (b) 60°C (c) 70°C [scale bars = 20  $\mu\text{m}$ ].

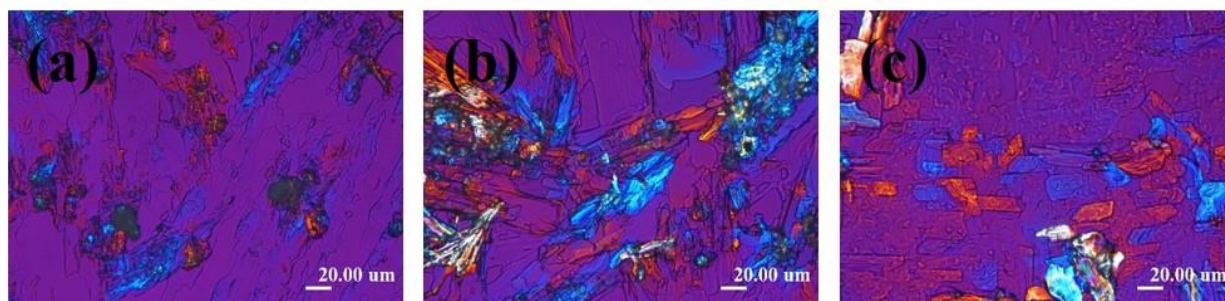

**Figure S-6.** AFM graphs of phthalic acid [in ethanol/water (20/80) solution] evaporation-crystallized at  $T_c = 110\text{ }^\circ\text{C}$ : (a) height image and (b) height profile, showing ca. 300 nm vertical drop from ridge to valley.

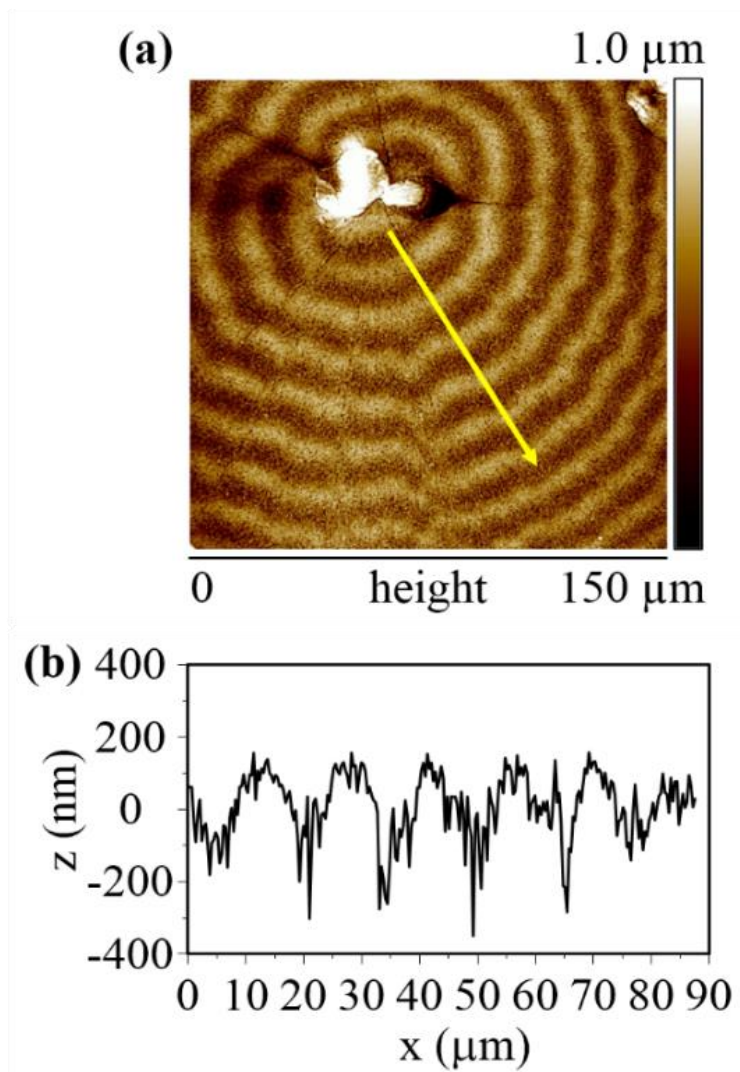

Supplement: c5ce02043c1.pdf [file c5ce02043c1.pdf]
